# Supplementary material
Source: MDPI journal article supplement (https://www.mdpi.com/2073-4344/12/11/1311)
Supplement: s1 [file s1]

## SUPPLEMENTARY MATERIALS

# Photoreactive Carbon Dots Modified g-C<sub>3</sub>N<sub>4</sub> for Effective Photooxidation of Bisphenol-A Under Visible Light Irradiation

Anwar Iqbal <sup>1</sup>, Fatimah Bukola Shittu <sup>1</sup>, Mohamad Nasir Mohamad Ibrahim <sup>1</sup>, N. H. H. Abu Bakar <sup>1</sup>, Noorfatimah Yahaya <sup>2</sup>, Kalaivizhi Rajappan <sup>3</sup>, M. Hazwan Hussin <sup>1</sup>, Wan Hazman Danial <sup>4</sup> and Lee D. Wilson <sup>5,\*</sup>

<sup>1</sup> School of Chemical Sciences, Universiti Sains Malaysia, Gelugor, Penang 11800, Malaysia

<sup>2</sup> Integrative Medicine Cluster, Advanced Medical and Dental Institute, Universiti Sains Malaysia, Bertam, Kepala Batas, Penang 13200, Malaysia

<sup>3</sup> Department of Chemistry, SRM. Institute of Science and Technology, Kattankulathur, Chengalpattu 603203, India

<sup>4</sup> Department of Chemistry, Kuliyah of Science, International Islamic University Malaysia, Kuantan, Pahang 25200, Malaysia

<sup>5</sup> Department of Chemistry, University of Saskatchewan, 110 Science Place, Room 165 Thorvaldson Building, Saskatoon, SK S7N 5C9, Canada

\* Correspondence: lee.wilson@usask.ca; Tel.: +1-306-966-2961

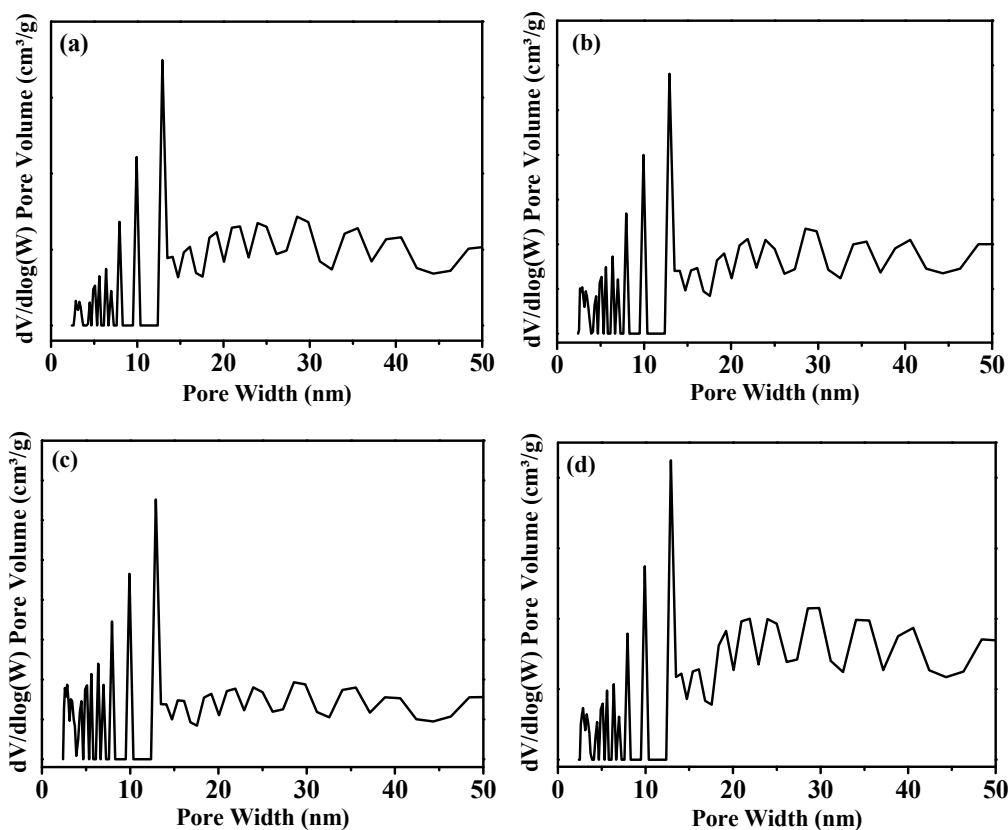

**Figure S1.** The DFT pore size distribution of (a) pure g-C<sub>3</sub>N<sub>4</sub>, (b) 0.5CDs/g-C<sub>3</sub>N<sub>4</sub>, (c) 1.0CDs/g-C<sub>3</sub>N<sub>4</sub> and (d) 1.5CDs/g-C<sub>3</sub>N<sub>4</sub>.

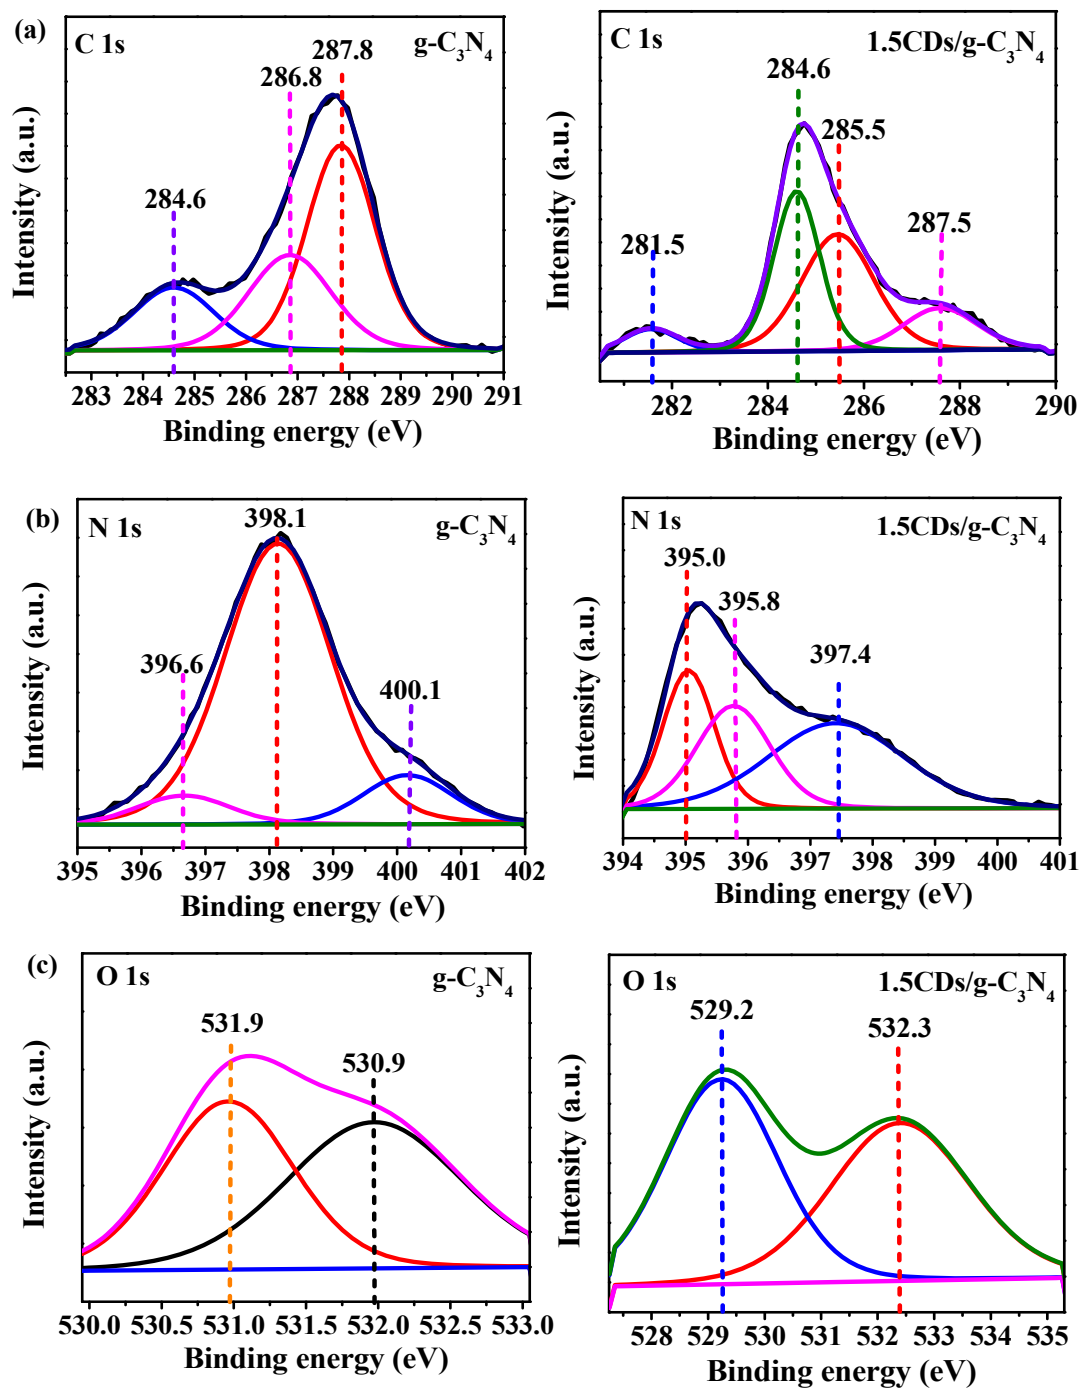

Figure S2. The deconvoluted (a) C 1s (b) N 1s and (c) O 1s XPS spectra of 1.5CDs/g-C<sub>3</sub>N<sub>4</sub>.

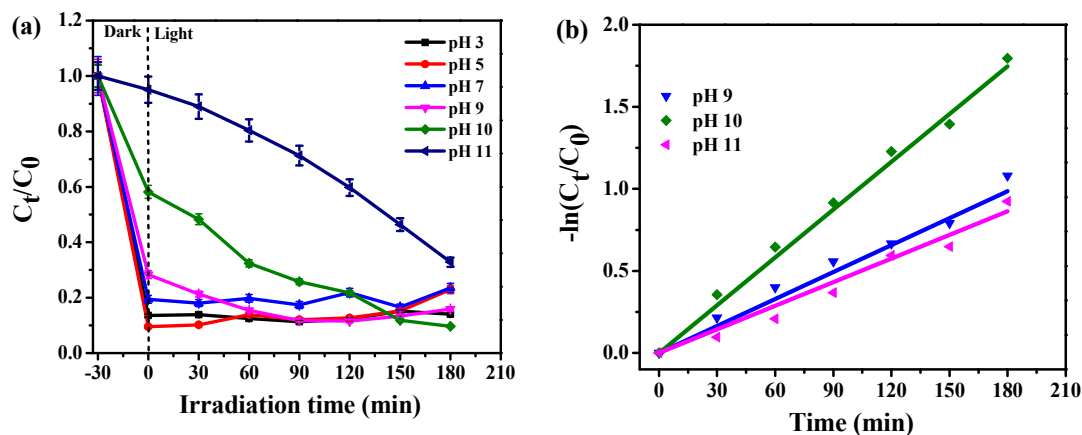

**Figure S3.** The (a) effect of different pH and (b) pseudo first-order kinetic fitting curves under visible light irradiation of BPA on the degradation of BPA. Reaction conditions: 1.5CDs/g- $C_3N_4$  dosage = 30 mg  $L^{-1}$ , BPA concentration = 10 mg  $L^{-1}$  and solution volume = 100 mL.

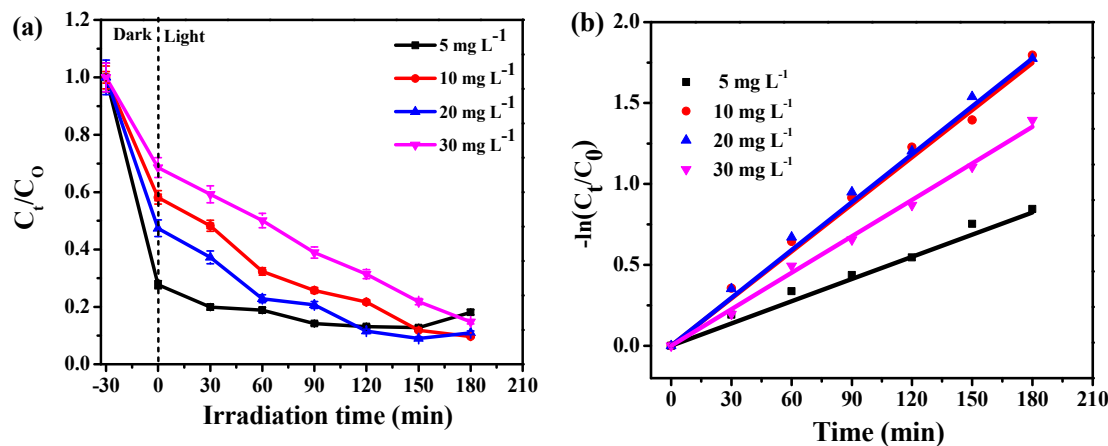

**Figure S4.** The (a) effect of initial concentration of BPA and (b) pseudo first-order kinetic fitting curves under visible light irradiation of BPA on the degradation of BPA. Reaction conditions: 1.5CDs/g- $C_3N_4$  dosage = 30 mg  $L^{-1}$ , solution volume = 100 mL and pH = 10.

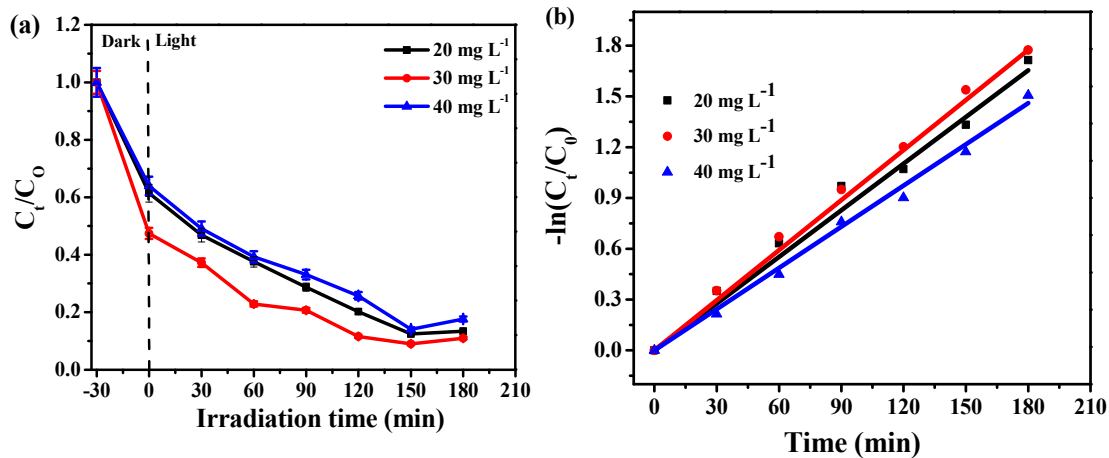

**Figure S5.** The (a) effect of catalyst dosage and (b) pseudo first-order kinetic fitting curves under visible light irradiation of BPA on the degradation of BPA. Reaction conditions: BPA concentration = 20 mg L<sup>-1</sup>, solution volume = 100 mL and pH = 10.

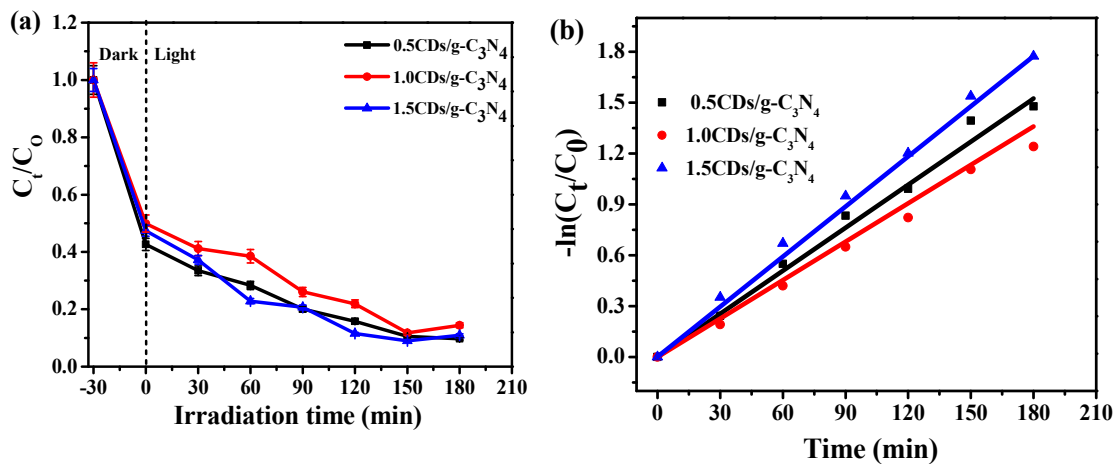

**Figure S6.** The (a) effect of CDs loading and (b) pseudo first-order kinetic fitting curves under visible light irradiation of BPA on the degradation of BPA. Reaction conditions: catalyst dosage = 30 mg L<sup>-1</sup>, BPA concentration = 20 mg L<sup>-1</sup>, solution volume = 100 mL and pH = 10.

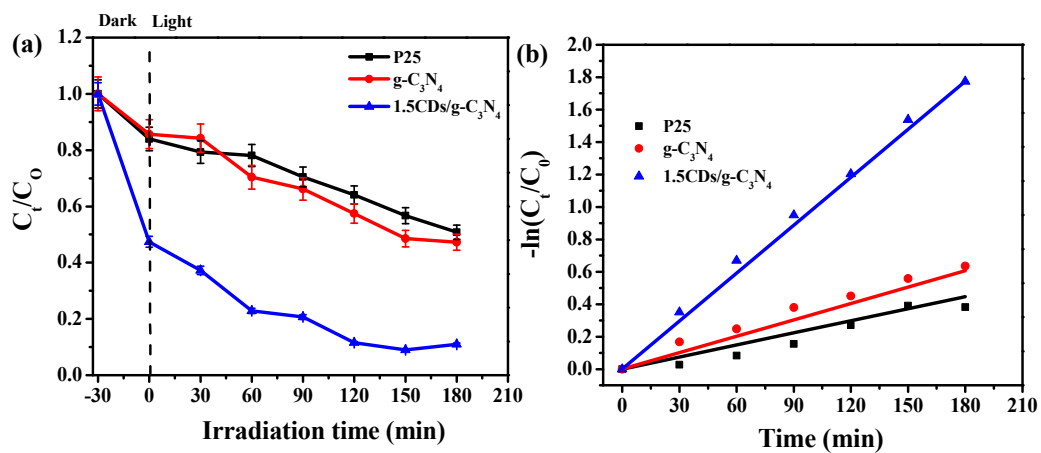

**Figure S7.** The (a) effect of different photocatalysts and (b) pseudo first-order kinetic fitting curves under visible light irradiation of BPA on the degradation of BPA. Reaction conditions: catalyst amounts = 30 mg L<sup>-1</sup>, BPA concentration = 20 mg L<sup>-1</sup>, solution volume = 100 mL and pH = 10.
